# Supplementary material for: Methyl substitution enhanced photoisomerization of trans,trans-1,4-diphenyl-1,3-butadiene: direct ab initio trajectory surface hopping dynamic simulations
Source: Royal Society of Chemistry journal article supplement (doi:10.1039/c7cp07465d), 2017-12-18
Supplement: c7cp07465d1.pdf [file c7cp07465d1.pdf]

# Single methyl substitute effect on photoisomerization of trans, trans-1,4-diphenyl-1,3-butadiene revealed by on-the-fly trajectory surface hopping dynamic simulations

Yueqian Fan,<sup>‡a</sup> Juan Chen,<sup>‡a</sup> Le Yu, Anyang Li,<sup>a</sup> Gaohong Zhai,<sup>a\*</sup> Yibo Lei,<sup>a,b\*</sup> Chaoyuan Zhu<sup>b</sup>

## Supporting information

|                                                                                                                                                                           |    |
|---------------------------------------------------------------------------------------------------------------------------------------------------------------------------|----|
| <b>S1.</b> Molecular orbital information of CAS(4,4)/6-31G and CAS(8,8)/6-31G for tt-DPB-me1 and tt-DPB-me2.....                                                          | 2  |
| <b>S2.</b> Cartesian coordinates of reactants tt-DPB-me1 and tt-DPB-me2 optimized at SA2-CASSCF(4,4)/6-31G level.....                                                     | 3  |
| <b>S3.</b> Cartesian coordinates of photoproducts of tt-DPB-me1 and tt-DPB-me2 optimized at SA2-CASSCF(4,4)/6-31G level.....                                              | 6  |
| <b>S4.</b> Cartesian coordinates of conical intersections and global minimal of S <sub>1</sub> of tt-DPB-me1 and tt-DPB-me2 optimized at SA2-CASSCF(4,4)/6-31G level..... | 15 |
| <b>S5.</b> Relative energies with respect to the linear interpolation of internal coordinates (LIICs) from reactants to photoproducts at SA2-CASSCF(4,4)/6-31G level..... | 20 |
| <b>S6.</b> The energies from SA2-CASSCF(4,4) and ICMRCI with 6-31G basis set calculations relative to the energy minima with respect to $\theta_1$ .....                  | 21 |

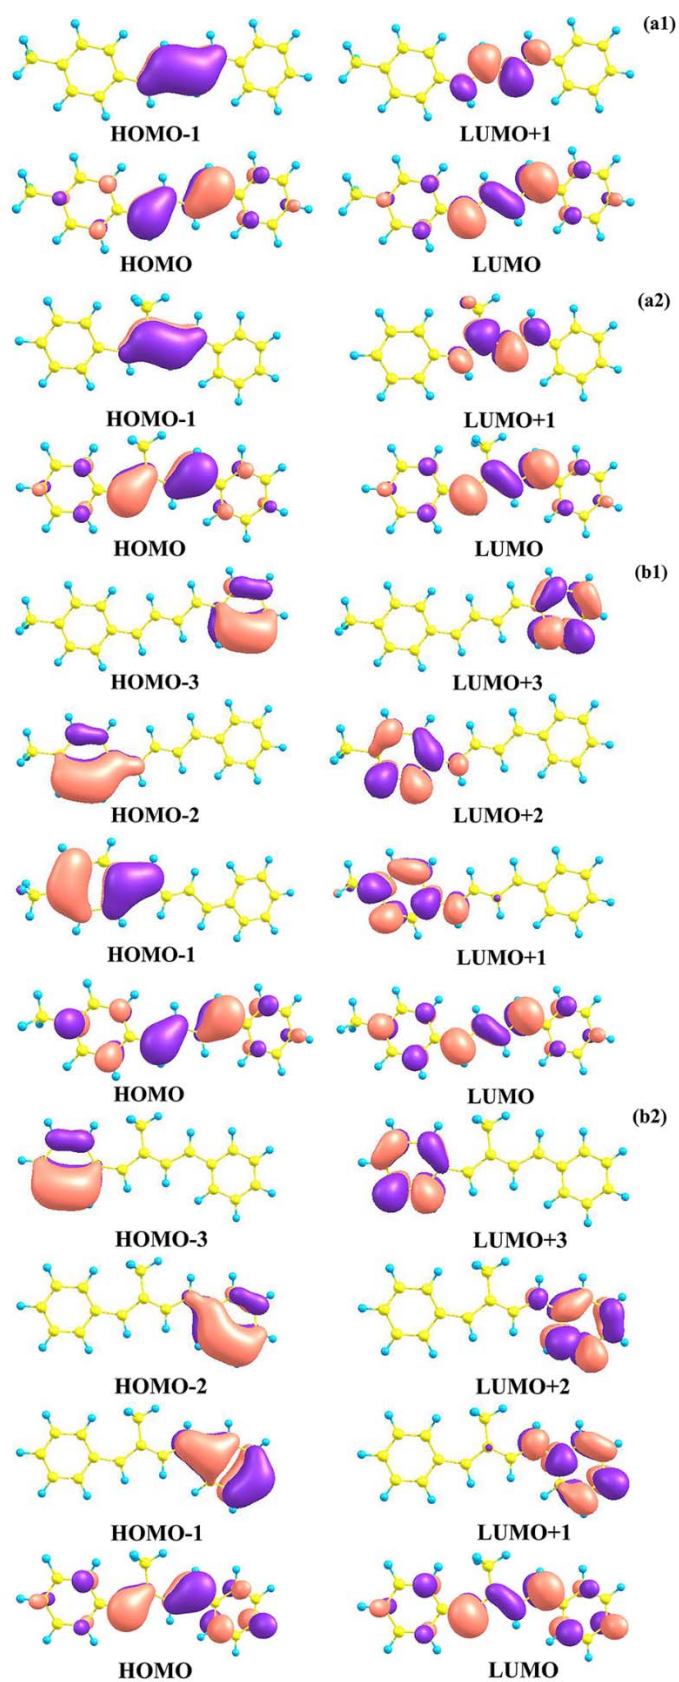

**Figure S1.** (a1) and (a2) are SA2-CASSCF(4,4)/6-31G and SA2-CASSCF(8,8)/6-31G computed HOMO and LUMO for tt-DPB-me1, (b1) and (b2) are the corresponding molecular orbitals for tt-DPB-me2.

**S2. Cartesian coordinates of reactants tt-DPB-me1/tt-DPB-me2 optimized at SA2-CASSCF(4,4)/6-31G level.**

**tt-DPB-me1 (S<sub>0</sub>)**

|   |             |             |             |
|---|-------------|-------------|-------------|
| C | 0.00000000  | 0.00000000  | 0.00000000  |
| C | 0.00000000  | 0.00000000  | 1.38437309  |
| C | 1.19606276  | 0.00000000  | 2.11071635  |
| C | 2.39663919  | 0.00002978  | 1.39105617  |
| C | 2.39647191  | 0.00003319  | 0.00697141  |
| C | 1.19948024  | 0.00008625  | -0.69694248 |
| C | 1.13321235  | -0.00002396 | 3.57342814  |
| C | 2.16160220  | 0.00025288  | 4.43662380  |
| C | 1.99493424  | 0.00022017  | 5.88585482  |
| C | 3.02768632  | 0.00043339  | 6.75823619  |
| C | 2.95339267  | -0.00027511 | 8.23817923  |
| C | 4.13511841  | -0.00515345 | 8.97004402  |
| C | 1.75442925  | 0.00697873  | 8.94837304  |
| C | 4.12560085  | -0.00395633 | 10.35836935 |
| C | 1.74520360  | 0.00812651  | 10.33253133 |
| C | 2.93077827  | 0.00004166  | 11.06396763 |
| C | 2.91041723  | -0.02445207 | 12.57374102 |
| H | -0.93171858 | -0.00005274 | -0.53266759 |
| H | -0.93452161 | -0.00001235 | 1.91375818  |
| H | 3.33498941  | 0.00001156  | 1.90950426  |
| H | 3.32975225  | 0.00001927  | -0.52309658 |
| H | 1.20285250  | 0.00019686  | -1.76982017 |
| H | 0.13627778  | -0.00015981 | 3.98084784  |
| H | 3.17468819  | 0.00039384  | 4.07677628  |
| H | 0.98103295  | -0.00024409 | 6.24455611  |
| H | 4.02782280  | 0.00036165  | 6.35859423  |
| H | 5.07657600  | -0.00742357 | 8.45248425  |
| H | 0.81720236  | 0.01476793  | 8.42707537  |
| H | 5.05836827  | -0.00483781 | 10.89111229 |
| H | 0.80410666  | 0.01707689  | 10.85092487 |
| H | 3.83574980  | 0.35870684  | 12.98579089 |
| H | 2.09801971  | 0.57551128  | 12.96640023 |
| H | 2.77928477  | -1.03604233 | 12.94577143 |

**tt-DPB-me1 (S<sub>1</sub>)**

|   |             |             |             |
|---|-------------|-------------|-------------|
| C | -0.03214188 | -0.11622713 | -0.08536850 |
| C | -0.07494482 | -0.05257634 | 1.29412203  |
| C | 1.09876889  | 0.07842508  | 2.05553446  |
| C | 2.31709900  | 0.14240454  | 1.36484310  |
| C | 2.35542023  | 0.07818881  | -0.01904196 |
| C | 1.18558604  | -0.05114503 | -0.75236605 |

|   |             |             |             |
|---|-------------|-------------|-------------|
| C | 1.00234465  | 0.14073492  | 3.49513947  |
| C | 2.15468586  | 0.27866657  | 4.43463234  |
| C | 1.97837943  | 0.33219171  | 5.84644342  |
| C | 3.13120994  | 0.47065968  | 6.78539243  |
| C | 3.03398481  | 0.53124479  | 8.22450042  |
| C | 4.20035937  | 0.66292043  | 8.99159380  |
| C | 1.81730615  | 0.46531135  | 8.91920543  |
| C | 4.15319429  | 0.72495532  | 10.37207600 |
| C | 1.77905137  | 0.52812528  | 10.30045822 |
| C | 2.94217617  | 0.65873683  | 11.05559003 |
| C | 2.88257988  | 0.72405302  | 12.56234425 |
| H | -0.94443107 | -0.21633866 | -0.64188066 |
| H | -1.02139673 | -0.10379998 | 1.79923621  |
| H | 3.23811547  | 0.24232609  | 1.90291997  |
| H | 3.30122035  | 0.12937718  | -0.52407767 |
| H | 1.21991200  | -0.10047368 | -1.82348195 |
| H | 0.02310547  | 0.08373798  | 3.93200447  |
| H | 3.14815951  | 0.33991712  | 4.03749643  |
| H | 0.98495402  | 0.27112865  | 6.24392636  |
| H | 4.11029631  | 0.52972897  | 6.34833447  |
| H | 5.15062237  | 0.71680247  | 8.49360136  |
| H | 0.89452828  | 0.36478631  | 8.38375914  |
| H | 5.06841395  | 0.82614959  | 10.92508510 |
| H | 0.82890308  | 0.47480201  | 10.80000362 |
| H | 2.45192335  | -0.18084118 | 12.97888596 |
| H | 3.87009693  | 0.84544373  | 12.98928032 |
| H | 2.27344572  | 1.55752942  | 12.89664338 |

**tt-DPB-me2 (S<sub>0</sub>)**

|   |             |             |             |
|---|-------------|-------------|-------------|
| C | -0.25843133 | 0.00031783  | 0.26426297  |
| C | 0.02632522  | 0.00054602  | 1.61974866  |
| C | 1.34072881  | 0.00027258  | 2.09518054  |
| C | 2.36626793  | -0.00027441 | 1.14898874  |
| C | 2.08380675  | -0.00050234 | -0.21062460 |
| C | 0.77403969  | -0.00019387 | -0.66036720 |
| C | 1.51001576  | 0.00054848  | 3.56893258  |
| C | 2.60967166  | 0.00086605  | 4.37198647  |
| C | 2.36056095  | 0.00106203  | 5.82650754  |
| C | 3.26314077  | 0.00073541  | 6.81920114  |
| C | 2.98013320  | 0.00106633  | 8.25904166  |
| C | 4.05729832  | -0.00441134 | 9.15282345  |
| C | 1.68892416  | 0.00699639  | 8.79903658  |
| C | 3.85705783  | -0.00408551 | 10.52266734 |
| C | 1.48856311  | 0.00723764  | 10.16868920 |
| C | 2.57005512  | 0.00125134  | 11.03940368 |

|                                   |             |             |             |
|-----------------------------------|-------------|-------------|-------------|
| H                                 | -1.27960372 | 0.00053550  | -0.06569105 |
| H                                 | -0.78412781 | 0.00093826  | 2.32418435  |
| H                                 | 3.38957533  | -0.00055458 | 1.45018542  |
| H                                 | 2.89325026  | -0.00092880 | -0.91551120 |
| H                                 | 0.56141773  | -0.00036072 | -1.71206747 |
| H                                 | 0.56351827  | 0.00051695  | 4.08095045  |
| H                                 | 1.31758183  | 0.00124547  | 6.08559678  |
| H                                 | 4.31023367  | -0.00018923 | 6.58450470  |
| H                                 | 5.05897783  | -0.00886015 | 8.76530196  |
| H                                 | 0.83397487  | 0.01195571  | 8.15256970  |
| H                                 | 4.70234407  | -0.00781498 | 11.18409746 |
| H                                 | 0.48798998  | 0.01238571  | 10.55719854 |
| H                                 | 2.41124040  | 0.00095475  | 12.10045924 |
| C                                 | 4.03427806  | 0.00101335  | 3.86208599  |
| H                                 | 4.23485905  | -0.87661617 | 3.25904695  |
| H                                 | 4.23419547  | 0.87793809  | 3.25781217  |
| H                                 | 4.75174631  | 0.00188238  | 4.66665782  |
| <b>tt-DPB-me2 (S<sub>1</sub>)</b> |             |             |             |
| C                                 | -0.29464826 | 0.00150893  | 0.20128553  |
| C                                 | -0.03403878 | 0.00149791  | 1.55771909  |
| C                                 | 1.28106369  | 0.00072985  | 2.06051511  |
| C                                 | 2.32132512  | -0.00003908 | 1.11950812  |
| C                                 | 2.05565655  | -0.00002996 | -0.24121069 |
| C                                 | 0.75203718  | 0.00074603  | -0.71184283 |
| C                                 | 1.43359723  | 0.00080654  | 3.50297663  |
| C                                 | 2.65229116  | 0.00023827  | 4.39501974  |
| C                                 | 2.37831612  | -0.00055655 | 5.80275295  |
| C                                 | 3.38510950  | -0.00226358 | 6.90647173  |
| C                                 | 3.05755299  | -0.00009761 | 8.31519089  |
| C                                 | 4.10217337  | -0.00300859 | 9.25558971  |
| C                                 | 1.74458918  | 0.00468438  | 8.80679240  |
| C                                 | 3.84787125  | -0.00124899 | 10.61344347 |
| C                                 | 1.49372574  | 0.00643962  | 10.17001182 |
| C                                 | 2.53895255  | 0.00348719  | 11.08095762 |
| H                                 | -1.31083371 | 0.00210698  | -0.14425827 |
| H                                 | -0.85454972 | 0.00209073  | 2.25048958  |
| H                                 | 3.34058824  | -0.00067085 | 1.43520311  |
| H                                 | 2.87500785  | -0.00063893 | -0.93484630 |
| H                                 | 0.55421170  | 0.00074909  | -1.76620476 |
| H                                 | 0.50621760  | 0.00128332  | 4.04529011  |
| H                                 | 1.34601943  | -0.00046366 | 6.08923413  |
| H                                 | 4.42544889  | -0.00586422 | 6.65420916  |
| H                                 | 5.11782289  | -0.00671006 | 8.90623976  |
| H                                 | 0.91314610  | 0.00716904  | 8.13161798  |

|   |            |             |             |
|---|------------|-------------|-------------|
| H | 4.66623373 | -0.00356304 | 11.30791630 |
| H | 0.47879751 | 0.01013764  | 10.51953614 |
| H | 2.33976396 | 0.00485962  | 12.13508969 |
| C | 4.05242645 | 0.00046698  | 3.84852756  |
| H | 4.24239888 | -0.87592063 | 3.23672320  |
| H | 4.24176866 | 0.87645658  | 3.23598610  |
| H | 4.78956648 | 0.00109127  | 4.63692579  |

**S3. Cartesian coordinates of photoproducts of tt-DPB-me1/tt-DPB-me2 optimized at SA2-CASSCF(4,4)/6-31G level.**

**cc-DPB-me1 (S<sub>0</sub>)**

|   |             |             |             |
|---|-------------|-------------|-------------|
| C | 0.12146604  | 0.12868765  | -0.03501916 |
| C | 0.07611067  | 0.05699556  | 1.33781724  |
| C | 1.25114481  | 0.07971313  | 2.11411795  |
| C | 2.47608509  | 0.20085884  | 1.43057257  |
| C | 2.51992248  | 0.26079521  | 0.05500163  |
| C | 1.34648241  | 0.22505315  | -0.69525674 |
| C | 1.14666638  | 0.01973327  | 3.58518123  |
| C | 2.01747286  | -0.56324921 | 4.46329390  |
| C | 3.22233583  | -1.35269146 | 4.13443759  |
| C | 4.26546106  | -1.58041506 | 4.92948176  |
| C | 4.52381016  | -1.03875240 | 6.28199131  |
| C | 5.13104098  | -1.85477637 | 7.24028458  |
| C | 4.22409263  | 0.27159246  | 6.64550541  |
| C | 5.39932875  | -1.38800900 | 8.51373528  |
| C | 4.49678024  | 0.73834829  | 7.92463488  |
| C | 5.08305178  | -0.08055098 | 8.88117516  |
| C | 5.38082641  | 0.42156037  | 10.27342598 |
| H | -0.79000170 | 0.10597657  | -0.60125446 |
| H | -0.87170861 | -0.02468415 | 1.83570252  |
| H | 3.38662939  | 0.26698088  | 1.99119691  |
| H | 3.46714374  | 0.35101591  | -0.44174270 |
| H | 1.38397701  | 0.27886284  | -1.76581179 |
| H | 0.25153407  | 0.45386987  | 3.99236697  |
| H | 1.76525868  | -0.51045809 | 5.50682475  |
| H | 3.22069206  | -1.83771957 | 3.17522190  |
| H | 5.02111569  | -2.25719327 | 4.56889707  |
| H | 5.38802658  | -2.86571711 | 6.98294740  |
| H | 3.79429054  | 0.93831102  | 5.92430844  |
| H | 5.86087837  | -2.04291245 | 9.23000565  |
| H | 4.25621197  | 1.75522580  | 8.17337867  |
| H | 4.84361796  | -0.15295847 | 11.02105434 |
| H | 6.43871599  | 0.34364035  | 10.50174657 |
| H | 5.09421527  | 1.45944820  | 10.38630039 |

**cc-DPB-me1 (S<sub>1</sub>)**

|   |             |             |             |
|---|-------------|-------------|-------------|
| C | -5.22287949 | -0.63431470 | 0.56644360  |
| C | -4.36692740 | -0.91143171 | -0.48466393 |
| C | -3.02399581 | -0.51034187 | -0.45297196 |
| C | -2.57331630 | 0.17490281  | 0.68215494  |
| C | -3.43216167 | 0.44862690  | 1.73451985  |
| C | -4.75991776 | 0.04879075  | 1.68333904  |
| C | -2.16013187 | -0.83578499 | -1.57943746 |
| C | -0.76183916 | -0.41576243 | -1.75812726 |
| C | -0.29412391 | 0.95255213  | -1.62366921 |
| C | 1.12327379  | 1.34548725  | -1.61087761 |
| C | 2.17373283  | 0.76142817  | -0.78961017 |
| C | 3.49876052  | 1.18622153  | -0.96395752 |
| C | 1.93378356  | -0.20183524 | 0.19442995  |
| C | 4.52625704  | 0.66836735  | -0.20009468 |
| C | 2.96979755  | -0.71565721 | 0.95929903  |
| C | 4.28250839  | -0.29630679 | 0.77722402  |
| C | 5.41317023  | -0.86699695 | 1.59819508  |
| H | -6.24729043 | -0.95071560 | 0.51628026  |
| H | -4.73454455 | -1.44201465 | -1.34313705 |
| H | -1.55148722 | 0.49193280  | 0.74271164  |
| H | -3.06320502 | 0.97326948  | 2.59521998  |
| H | -5.42218779 | 0.26401849  | 2.49954328  |
| H | -2.56514477 | -1.50268647 | -2.31926421 |
| H | -0.05606421 | -1.16127787 | -2.07909769 |
| H | -1.02901596 | 1.73772732  | -1.60357699 |
| H | 1.39845662  | 2.19031753  | -2.21650339 |
| H | 3.71659162  | 1.93003325  | -1.70784044 |
| H | 0.93546544  | -0.55083443 | 0.36857792  |
| H | 5.52992814  | 1.01706836  | -0.36115015 |
| H | 2.74940470  | -1.45211678 | 1.70962348  |
| H | 6.05553722  | -1.50089565 | 0.99453959  |
| H | 6.03255437  | -0.08086211 | 2.01601049  |
| H | 5.03927525  | -1.46566976 | 2.41922164  |

**cc-DPB-me2 (S<sub>0</sub>)**

|   |             |             |             |
|---|-------------|-------------|-------------|
| C | -1.64769346 | 0.24557319  | 0.21494035  |
| C | -1.36203583 | 0.09477914  | 1.56225106  |
| C | -0.09833528 | -0.31490770 | 1.99218517  |
| C | 0.88134409  | -0.53963796 | 1.02642258  |
| C | 0.59691126  | -0.38982766 | -0.32480355 |
| C | -0.66725974 | -0.00075599 | -0.73563062 |
| C | 0.15167890  | -0.44948424 | 3.44415657  |
| C | 0.88757357  | -1.37231758 | 4.08544780  |
| C | 1.47101868  | -2.52605548 | 3.37525071  |

|                                   |             |             |             |
|-----------------------------------|-------------|-------------|-------------|
| C                                 | 2.55900478  | -3.25316573 | 3.65267991  |
| C                                 | 3.62937906  | -3.00796779 | 4.64431273  |
| C                                 | 4.10557607  | -4.08157940 | 5.43420191  |
| C                                 | 4.24540838  | -1.76937077 | 4.77900425  |
| C                                 | 5.12432445  | -3.89591467 | 6.33154720  |
| C                                 | 5.29194527  | -1.58536347 | 5.69637605  |
| C                                 | 5.72567514  | -2.63381327 | 6.46852568  |
| H                                 | -2.62875137 | 0.55532016  | -0.09100735 |
| H                                 | -2.12645169 | 0.28932616  | 2.29143325  |
| H                                 | 1.87257921  | -0.81222284 | 1.32938573  |
| H                                 | 1.36734516  | -0.56659893 | -1.05107718 |
| H                                 | -0.88416934 | 0.11878577  | -1.77979919 |
| H                                 | -0.34402866 | 0.29204366  | 4.04587972  |
| H                                 | 0.89206601  | -2.85545037 | 2.53051623  |
| H                                 | 2.71227331  | -4.13404252 | 3.05195706  |
| H                                 | 3.65159923  | -5.04924600 | 5.32878836  |
| H                                 | 3.92363752  | -0.94805876 | 4.16807964  |
| H                                 | 5.46900979  | -4.71684738 | 6.93081730  |
| H                                 | 5.75342023  | -0.62042365 | 5.78436354  |
| H                                 | 6.52635419  | -2.49736711 | 7.16982146  |
| C                                 | 1.00176259  | -1.30800600 | 5.59585701  |
| H                                 | 0.82860114  | -2.28273664 | 6.03753344  |
| H                                 | 1.97867673  | -0.97846861 | 5.92269275  |
| H                                 | 0.26972812  | -0.61986136 | 5.99968254  |
| <b>cc-DPB-me2 (S<sub>1</sub>)</b> |             |             |             |
| C                                 | -0.94129591 | 0.73906607  | 0.14672389  |
| C                                 | -1.15379326 | 0.27756677  | 1.43365499  |
| C                                 | -0.18403647 | -0.48072449 | 2.10554894  |
| C                                 | 1.01170739  | -0.75356158 | 1.42862804  |
| C                                 | 1.22350134  | -0.28651330 | 0.14147376  |
| C                                 | 0.25063038  | 0.45971379  | -0.50822511 |
| C                                 | -0.45696171 | -0.92056795 | 3.46698785  |
| C                                 | 0.39468827  | -1.76359118 | 4.32941792  |
| C                                 | 0.97293253  | -3.00608794 | 3.83624558  |
| C                                 | 2.09588046  | -3.73745614 | 4.44274674  |
| C                                 | 3.40745023  | -3.19933660 | 4.77869352  |
| C                                 | 4.34889617  | -4.03292238 | 5.39858795  |
| C                                 | 3.78684913  | -1.88118662 | 4.49834202  |
| C                                 | 5.60985472  | -3.56900790 | 5.72854396  |
| C                                 | 5.05163059  | -1.41982798 | 4.82699205  |
| C                                 | 5.96891505  | -2.25783542 | 5.44448332  |
| H                                 | -1.70206217 | 1.31585647  | -0.34385938 |
| H                                 | -2.07871012 | 0.50222532  | 1.93129160  |
| H                                 | 1.77621733  | -1.33245178 | 1.90578644  |



|                                   |             |             |             |
|-----------------------------------|-------------|-------------|-------------|
| H                                 | 2.14957614  | -0.50736850 | -0.35437830 |
| H                                 | 0.41772246  | 0.81682158  | -1.50603437 |
| H                                 | -1.35528731 | -0.53627287 | 3.91822788  |
| H                                 | 0.52265458  | -3.44216467 | 2.96103165  |
| H                                 | 1.96870593  | -4.79835397 | 4.56603267  |
| H                                 | 4.08216437  | -5.04943107 | 5.62047619  |
| H                                 | 3.09436629  | -1.21714662 | 4.02101224  |
| H                                 | 6.31147275  | -4.22723930 | 6.20448190  |
| H                                 | 5.32029516  | -0.40583198 | 4.59938343  |
| H                                 | 6.94656796  | -1.89676938 | 5.69917450  |
| C                                 | 0.55290336  | -1.33949385 | 5.76676257  |
| H                                 | 0.95559904  | -2.13549948 | 6.37789854  |
| H                                 | 1.21561209  | -0.48307686 | 5.86222780  |
| H                                 | -0.40647928 | -1.04519401 | 6.18343133  |
| <b>ct-DPB-me1 (S<sub>0</sub>)</b> |             |             |             |
| C                                 | -0.00000000 | -0.00000000 | 0.00000000  |
| C                                 | -0.00000000 | -0.00000000 | 1.38642006  |
| C                                 | 1.19411967  | -0.00000000 | 2.10978313  |
| C                                 | 2.39414642  | 0.01361601  | 1.39423499  |
| C                                 | 2.39571774  | 0.01317067  | 0.00965606  |
| C                                 | 1.19891016  | 0.00371491  | -0.69480038 |
| C                                 | 1.13298410  | -0.00738375 | 3.57867649  |
| C                                 | 2.14678389  | -0.21415001 | 4.43031792  |
| C                                 | 1.98345710  | -0.16850969 | 5.87514535  |
| C                                 | 2.90462483  | -0.44067640 | 6.80673374  |
| C                                 | 4.28695800  | -0.92923474 | 6.60804689  |
| C                                 | 5.33497730  | -0.34781809 | 7.35905423  |
| C                                 | 4.60128342  | -1.96154119 | 5.75392662  |
| C                                 | 6.62688874  | -0.77536730 | 7.22312076  |
| C                                 | 5.92896644  | -2.40455988 | 5.61266720  |
| C                                 | 6.95700932  | -1.82319223 | 6.33362191  |
| C                                 | 8.38866893  | -2.28215542 | 6.19656405  |
| H                                 | -0.93160366 | -0.00201546 | -0.53280887 |
| H                                 | -0.93469239 | -0.00437792 | 1.91554522  |
| H                                 | 3.33060100  | 0.03688107  | 1.91600305  |
| H                                 | 3.32930315  | 0.02643582  | -0.51961980 |
| H                                 | 1.20334283  | 0.00434388  | -1.76774945 |
| H                                 | 0.15177592  | 0.16138702  | 3.98957829  |
| H                                 | 3.13342485  | -0.40809620 | 4.05727297  |
| H                                 | 1.01567149  | 0.15428716  | 6.21911534  |
| H                                 | 2.62829532  | -0.27760819 | 7.83417479  |
| H                                 | 5.10568698  | 0.44902432  | 8.04202808  |
| H                                 | 3.82452745  | -2.45549323 | 5.20297935  |
| H                                 | 7.40517297  | -0.31219773 | 7.80157282  |

|                                   |             |             |             |     |
|-----------------------------------|-------------|-------------|-------------|-----|
| H                                 | 6.13970570  | -3.21456306 | 4.93934960  |     |
| H                                 | 8.47030458  | -3.11624278 | 5.51113101  |     |
| H                                 | 9.02169121  | -1.48373687 | 5.82322390  |     |
| H                                 | 8.79290843  | -2.59813821 | 7.15244903  | ct- |
| <b>DPB-me1 (S<sub>1</sub>)</b>    |             |             |             |     |
| C                                 | -5.27882926 | -1.25682399 | 0.39796188  |     |
| C                                 | -3.99248500 | -0.78107436 | 0.23242808  |     |
| C                                 | -3.70452661 | 0.59138728  | 0.32434172  |     |
| C                                 | -4.77021104 | 1.46252567  | 0.59052146  |     |
| C                                 | -6.05920969 | 0.98097061  | 0.75595448  |     |
| C                                 | -6.32254210 | -0.37718622 | 0.66128158  |     |
| C                                 | -2.34496580 | 1.04127920  | 0.14383368  |     |
| C                                 | -1.88422575 | 2.46116451  | 0.20819012  |     |
| C                                 | -0.50935467 | 2.75709091  | -0.00774896 |     |
| C                                 | 0.24912218  | 4.05012690  | -0.01786179 |     |
| C                                 | -0.18682168 | 5.41240584  | -0.23077150 |     |
| C                                 | 0.78257970  | 6.42761320  | -0.16654407 |     |
| C                                 | -1.50208933 | 5.81682830  | -0.49917147 |     |
| C                                 | 0.45900613  | 7.75708070  | -0.35712703 |     |
| C                                 | -1.81851426 | 7.15113012  | -0.68904710 |     |
| C                                 | -0.85055951 | 8.14848424  | -0.62270516 |     |
| C                                 | -1.21465000 | 9.59815645  | -0.83145920 |     |
| H                                 | -5.47057497 | -2.31014045 | 0.32245411  |     |
| H                                 | -3.19340331 | -1.46937495 | 0.02919506  |     |
| H                                 | -4.59841719 | 2.51696933  | 0.66970550  |     |
| H                                 | -6.85806578 | 1.66853256  | 0.95904810  |     |
| H                                 | -7.32182743 | -0.74565520 | 0.78997212  |     |
| H                                 | -1.59804759 | 0.29573948  | -0.05556762 |     |
| H                                 | -2.59956286 | 3.22208809  | 0.41441627  |     |
| H                                 | 0.12234769  | 1.90817398  | -0.20106273 |     |
| H                                 | 1.29841272  | 3.92676680  | 0.17101121  |     |
| H                                 | 1.80296360  | 6.16078189  | 0.03657591  |     |
| H                                 | -2.28902880 | 5.09899542  | -0.56350994 |     |
| H                                 | 1.23295230  | 8.49961221  | -0.29889345 |     |
| H                                 | -2.83922956 | 7.41937103  | -0.89294267 |     |
| H                                 | -1.65664212 | 9.75629095  | -1.80981541 |     |
| H                                 | -1.93414820 | 9.93390646  | -0.09165796 |     |
| H                                 | -0.34317494 | 10.23624661 | -0.75655881 |     |
| <b>ct-DPB-me2 (S<sub>0</sub>)</b> |             |             |             |     |
| C                                 | -2.90306122 | -0.70291358 | 1.86703762  |     |
| C                                 | -1.58258612 | -0.34024192 | 1.83023311  |     |
| C                                 | -0.57025778 | -1.28822615 | 1.55551650  |     |
| C                                 | -0.94471245 | -2.58970103 | 1.29806361  |     |
| C                                 | -2.29766404 | -2.97062358 | 1.33421504  |     |

|                                   |             |             |            |
|-----------------------------------|-------------|-------------|------------|
| C                                 | -3.27536507 | -2.03753148 | 1.61990678 |
| C                                 | 0.83847812  | -0.83096572 | 1.49864760 |
| C                                 | 1.91812000  | -1.37831209 | 2.07620577 |
| C                                 | 1.83078932  | -2.53171635 | 2.97747832 |
| C                                 | 2.87631156  | -3.20594504 | 3.47461776 |
| C                                 | 2.82202186  | -4.34373964 | 4.40634301 |
| C                                 | 3.98547288  | -5.08218568 | 4.63215832 |
| C                                 | 1.66253987  | -4.72344939 | 5.08764459 |
| C                                 | 3.99165083  | -6.16844605 | 5.49341184 |
| C                                 | 1.66708972  | -5.80855213 | 5.94776529 |
| C                                 | 2.83082706  | -6.53773129 | 6.15415776 |
| H                                 | -3.65655076 | 0.03033048  | 2.08318207 |
| H                                 | -1.30158732 | 0.67914256  | 2.01891358 |
| H                                 | -0.19900839 | -3.31907749 | 1.04772309 |
| H                                 | -2.56488983 | -3.98977299 | 1.12894680 |
| H                                 | -4.30995911 | -2.32123438 | 1.64481762 |
| H                                 | 0.98716495  | 0.06329206  | 0.91797274 |
| H                                 | 0.83838740  | -2.82810504 | 3.25334032 |
| H                                 | 3.86982393  | -2.92849135 | 3.17382730 |
| H                                 | 4.89048591  | -4.80466775 | 4.12451636 |
| H                                 | 0.75541396  | -4.16699292 | 4.95740743 |
| H                                 | 4.89836755  | -6.72177345 | 5.64680649 |
| H                                 | 0.76512920  | -6.08156440 | 6.46141638 |
| H                                 | 2.83146897  | -7.37682033 | 6.82286481 |
| C                                 | 3.28122615  | -0.76853624 | 1.83818725 |
| H                                 | 3.75361665  | -0.48497611 | 2.77267766 |
| H                                 | 3.94342942  | -1.46849118 | 1.33808817 |
| H                                 | 3.20764401  | 0.11320241  | 1.21593358 |
| <b>ct-DPB-mel (S<sub>1</sub>)</b> |             |             |            |
| C                                 | -2.68353574 | -1.70972710 | 1.87995533 |
| C                                 | -1.56073741 | -0.90518049 | 1.98812873 |
| C                                 | -0.27371174 | -1.45505954 | 1.99846931 |
| C                                 | -0.15545006 | -2.84520358 | 1.88600503 |
| C                                 | -1.27875832 | -3.64811452 | 1.78488562 |
| C                                 | -2.54925494 | -3.08691077 | 1.78102515 |
| C                                 | 0.88590320  | -0.56613236 | 2.06619919 |
| C                                 | 2.25678333  | -0.93468997 | 2.40457216 |
| C                                 | 2.52194098  | -1.38768578 | 3.76242664 |
| C                                 | 3.15725278  | -2.71120652 | 3.75364789 |
| C                                 | 2.61201168  | -3.94207847 | 4.31366294 |
| C                                 | 3.33616480  | -5.13381909 | 4.17760164 |
| C                                 | 1.40804424  | -3.98278645 | 5.02632159 |
| C                                 | 2.88189240  | -6.31537124 | 4.73697648 |
| C                                 | 0.95289247  | -5.16725068 | 5.58160428 |

|                                   |             |             |             |
|-----------------------------------|-------------|-------------|-------------|
| C                                 | 1.68636912  | -6.33759431 | 5.44268114  |
| H                                 | -3.65940187 | -1.26251169 | 1.87576324  |
| H                                 | -1.67712160 | 0.15958561  | 2.06857188  |
| H                                 | 0.81680836  | -3.29612785 | 1.87883756  |
| H                                 | -1.16182037 | -4.71205356 | 1.70525453  |
| H                                 | -3.41740483 | -3.71205487 | 1.69864272  |
| H                                 | 0.68696977  | 0.48825316  | 1.95346553  |
| H                                 | 1.82852763  | -1.12278314 | 4.53788715  |
| H                                 | 4.07682136  | -2.80687147 | 3.20586660  |
| H                                 | 4.26202873  | -5.12565556 | 3.63298199  |
| H                                 | 0.82087196  | -3.09319770 | 5.13433394  |
| H                                 | 3.45573007  | -7.21498978 | 4.62211113  |
| H                                 | 0.02498643  | -5.17677623 | 6.12060904  |
| H                                 | 1.33103478  | -7.25273791 | 5.87559966  |
| C                                 | 3.35648972  | -0.72052321 | 1.40107790  |
| H                                 | 4.33624491  | -0.89074207 | 1.82851428  |
| H                                 | 3.23877022  | -1.35459270 | 0.52817900  |
| H                                 | 3.32247516  | 0.30777260  | 1.04816530  |
| <b>tc-DPB-me1 (S<sub>0</sub>)</b> |             |             |             |
| C                                 | 0.00000000  | 0.00000000  | -0.00000000 |
| C                                 | 0.00000000  | -0.00000000 | 1.36965878  |
| C                                 | 1.21008094  | 0.00000000  | 2.10072014  |
| C                                 | 2.39874731  | 0.02796417  | 1.40252558  |
| C                                 | 2.40731197  | 0.02961521  | -0.00313827 |
| C                                 | 1.21787860  | 0.01147896  | -0.70559383 |
| C                                 | 1.15139362  | 0.01701324  | 3.57950489  |
| C                                 | 1.87077847  | -0.71096758 | 4.44100102  |
| C                                 | 2.94278950  | -1.64568468 | 4.13496902  |
| C                                 | 3.66013790  | -2.25844621 | 5.08731452  |
| C                                 | 4.77755604  | -3.19305012 | 4.90052054  |
| C                                 | 5.51747133  | -3.59530361 | 6.01029317  |
| C                                 | 5.14540001  | -3.71519581 | 3.65686339  |
| C                                 | 6.58591050  | -4.47195687 | 5.88739452  |
| C                                 | 6.20988387  | -4.58820777 | 3.53753588  |
| C                                 | 6.95275869  | -4.98305452 | 4.65038398  |
| C                                 | 8.11288119  | -5.93779759 | 4.50235334  |
| H                                 | -0.92859840 | -0.00702658 | -0.53811063 |
| H                                 | -0.93073077 | -0.00780384 | 1.90560485  |
| H                                 | 3.32907516  | 0.07158240  | 1.93448526  |
| H                                 | 3.34465794  | 0.05354759  | -0.52546679 |
| H                                 | 1.21790577  | 0.01628211  | -1.77860458 |
| H                                 | 0.42613528  | 0.69626819  | 3.99288177  |
| H                                 | 1.61688879  | -0.62879283 | 5.48413731  |
| H                                 | 3.13423973  | -1.84799911 | 3.09944651  |

|                                   |             |             |             |            |
|-----------------------------------|-------------|-------------|-------------|------------|
| H                                 | 3.41601807  | -2.05063281 | 6.11584508  |            |
| H                                 | 5.25815191  | -3.21703109 | 6.98183930  |            |
| H                                 | 4.59365127  | -3.44847513 | 2.77668421  |            |
| H                                 | 7.13514416  | -4.75817237 | 6.76488183  |            |
| H                                 | 6.46626284  | -4.97370356 | 2.56768903  |            |
| H                                 | 7.79382004  | -6.87915744 | 4.06750404  |            |
| H                                 | 8.88116324  | -5.52471174 | 3.85704857  |            |
| H                                 | 8.56804637  | -6.15413266 | 5.46054408  | <b>tc-</b> |
| <b>DPB-me1 (S<sub>1</sub>)</b>    |             |             |             |            |
| C                                 | -0.03214188 | -0.11622713 | -0.08536850 |            |
| C                                 | -0.07494482 | -0.05257634 | 1.29412203  |            |
| C                                 | 1.09876889  | 0.07842508  | 2.05553446  |            |
| C                                 | 2.31709900  | 0.14240454  | 1.36484310  |            |
| C                                 | 2.35542023  | 0.07818881  | -0.01904196 |            |
| C                                 | 1.18558604  | -0.05114503 | -0.75236605 |            |
| C                                 | 1.00234465  | 0.14073492  | 3.49513947  |            |
| C                                 | 2.15468586  | 0.27866657  | 4.43463234  |            |
| C                                 | 1.97837943  | 0.33219171  | 5.84644342  |            |
| C                                 | 3.13120994  | 0.47065968  | 6.78539243  |            |
| C                                 | 3.03398481  | 0.53124479  | 8.22450042  |            |
| C                                 | 4.20035937  | 0.66292043  | 8.99159380  |            |
| C                                 | 1.81730615  | 0.46531135  | 8.91920543  |            |
| C                                 | 4.15319429  | 0.72495532  | 10.37207600 |            |
| C                                 | 1.77905137  | 0.52812528  | 10.30045822 |            |
| C                                 | 2.94217617  | 0.65873683  | 11.05559003 |            |
| C                                 | 2.88257988  | 0.72405302  | 12.56234425 |            |
| H                                 | -0.94443107 | -0.21633866 | -0.64188066 |            |
| H                                 | -1.02139673 | -0.10379998 | 1.79923621  |            |
| H                                 | 3.23811547  | 0.24232609  | 1.90291997  |            |
| H                                 | 3.30122035  | 0.12937718  | -0.52407767 |            |
| H                                 | 1.21991200  | -0.10047368 | -1.82348195 |            |
| H                                 | 0.02310547  | 0.08373798  | 3.93200447  |            |
| H                                 | 3.14815951  | 0.33991712  | 4.03749643  |            |
| H                                 | 0.98495402  | 0.27112865  | 6.24392636  |            |
| H                                 | 4.11029631  | 0.52972897  | 6.34833447  |            |
| H                                 | 5.15062237  | 0.71680247  | 8.49360136  |            |
| H                                 | 0.89452828  | 0.36478631  | 8.38375914  |            |
| H                                 | 5.06841395  | 0.82614959  | 10.92508510 |            |
| H                                 | 0.82890308  | 0.47480201  | 10.80000362 |            |
| H                                 | 2.45192335  | -0.18084118 | 12.97888596 |            |
| H                                 | 3.87009693  | 0.84544373  | 12.98928032 |            |
| H                                 | 2.27344572  | 1.55752942  | 12.89664338 |            |
| <b>tc-DPB-me2 (S<sub>0</sub>)</b> |             |             |             |            |
| C                                 | -2.18281723 | 0.84474905  | 0.62239519  |            |

|   |             |             |             |
|---|-------------|-------------|-------------|
| C | -1.37745504 | 0.57028803  | 1.71633940  |
| C | -0.30471846 | -0.31792599 | 1.62040831  |
| C | -0.08387095 | -0.94609609 | 0.39659134  |
| C | -0.89022058 | -0.67498462 | -0.70088130 |
| C | -1.93870075 | 0.22390519  | -0.59338695 |
| C | 0.50691938  | -0.58251155 | 2.82744285  |
| C | 1.83463745  | -0.77638637 | 2.93406300  |
| C | 2.36357397  | -1.00228144 | 4.29058126  |
| C | 3.52119169  | -1.52765627 | 4.70853622  |
| C | 4.59346793  | -2.19908587 | 3.93823479  |
| C | 5.94038469  | -1.80620659 | 4.12392250  |
| C | 4.33245074  | -3.26911027 | 3.09069041  |
| C | 6.95620125  | -2.44305575 | 3.45994932  |
| C | 5.37705548  | -3.92125101 | 2.41624823  |
| C | 6.67494481  | -3.51216440 | 2.59328976  |
| H | -2.99695566 | 1.53731698  | 0.71964633  |
| H | -1.57600953 | 1.05283520  | 2.65514165  |
| H | 0.70481406  | -1.66510118 | 0.30299362  |
| H | -0.70241009 | -1.17305264 | -1.63292594 |
| H | -2.56222300 | 0.43177246  | -1.44166568 |
| H | -0.06590742 | -0.59341776 | 3.73898747  |
| H | 1.70270246  | -0.66271315 | 5.06968836  |
| H | 3.70143393  | -1.49670657 | 5.77010486  |
| H | 6.15997679  | -0.99192667 | 4.78891689  |
| H | 3.32249913  | -3.60814927 | 2.96290801  |
| H | 7.97212160  | -2.12767159 | 3.60290425  |
| H | 5.15301326  | -4.74579749 | 1.76662462  |
| H | 7.47613612  | -4.00873482 | 2.08037258  |
| C | 2.79206903  | -0.65583402 | 1.76822341  |
| H | 3.73291234  | -0.23663358 | 2.09853972  |
| H | 3.01562772  | -1.60887831 | 1.30552851  |
| H | 2.38383859  | -0.00572627 | 1.00684989  |

**tc-DPB-me2 (S<sub>1</sub>)**

|   |             |             |             |
|---|-------------|-------------|-------------|
| C | -1.85492090 | -2.02243901 | 0.58885884  |
| C | -1.21111293 | -1.32860734 | 1.59817148  |
| C | 0.14647959  | -0.99324511 | 1.50025694  |
| C | 0.83473115  | -1.38864534 | 0.34695505  |
| C | 0.18948774  | -2.08764118 | -0.66059363 |
| C | -1.15627460 | -2.40675160 | -0.54756529 |
| C | 0.75388606  | -0.22874521 | 2.58615450  |
| C | 2.14227219  | 0.21828396  | 2.76794277  |
| C | 2.66274707  | -0.47232591 | 3.94128136  |
| C | 3.98341077  | -1.09533490 | 3.98298804  |
| C | 4.49561384  | -2.11936807 | 3.07855701  |

|   |             |             |             |
|---|-------------|-------------|-------------|
| C | 5.87174534  | -2.37383723 | 3.03217569  |
| C | 3.65802937  | -2.90366672 | 2.27677412  |
| C | 6.38993622  | -3.36497150 | 2.21509395  |
| C | 4.17834441  | -3.89279118 | 1.45884670  |
| C | 5.54621940  | -4.12909595 | 1.42132422  |
| H | -2.89560468 | -2.26467543 | 0.68862882  |
| H | -1.76036367 | -1.03706654 | 2.47383919  |
| H | 1.87322136  | -1.15766467 | 0.23731697  |
| H | 0.73857902  | -2.38157847 | -1.53467147 |
| H | -1.65216738 | -2.94622239 | -1.33121703 |
| H | 0.10414871  | -0.03921457 | 3.42523945  |
| H | 2.05433624  | -0.47005444 | 4.82995588  |
| H | 4.68885432  | -0.67127343 | 4.67817527  |
| H | 6.53450760  | -1.78726997 | 3.64068909  |
| H | 2.59830078  | -2.74613023 | 2.30446453  |
| H | 7.44898119  | -3.53918476 | 2.19700207  |
| H | 3.51455409  | -4.48246018 | 0.85551337  |
| H | 5.94635734  | -4.89653887 | 0.78716639  |
| C | 3.02389133  | 0.79639119  | 1.70062987  |
| H | 3.82169179  | 1.37126908  | 2.16139000  |
| H | 3.50209289  | 0.05531624  | 1.06564852  |
| H | 2.45314518  | 1.45972303  | 1.06067686  |

**S4. Cartesian coordinates of conical intersections and global minimal of S<sub>1</sub> of tt-DPB-me1/tt-DPB-me2 optimized at SA2-CASSCF(4,4)/6-31G.**

**CI1-me1**

|   |             |             |             |
|---|-------------|-------------|-------------|
| C | 0.00000000  | 0.00000000  | 0.00000000  |
| C | 0.00000000  | 0.00000000  | 1.38364859  |
| C | 1.20049059  | 0.00000000  | 2.10505887  |
| C | 2.40079205  | 0.01087774  | 1.38609641  |
| C | 2.39788747  | 0.01295822  | 0.00011691  |
| C | 1.20002528  | 0.00605702  | -0.69985522 |
| C | 1.17455352  | -0.03083716 | 3.56228976  |
| C | 2.36760779  | -0.10991467 | 4.39615357  |
| C | 2.72064494  | 1.06348614  | 5.15949188  |
| C | 2.51477428  | 0.55891639  | 6.51996373  |
| C | 1.33722325  | 0.80307507  | 7.35067652  |
| C | 1.19958997  | 0.13332940  | 8.57224867  |
| C | 0.33510761  | 1.70791981  | 6.99422059  |
| C | 0.11483764  | 0.36234536  | 9.39697673  |
| C | -0.75454713 | 1.92838662  | 7.82277930  |
| C | -0.88482092 | 1.26571589  | 9.03802877  |
| C | -2.05746722 | 1.52512688  | 9.95214510  |
| H | -0.93195808 | -0.00317698 | -0.53249156 |

|   |             |             |             |
|---|-------------|-------------|-------------|
| H | -0.93257347 | -0.00397082 | 1.91651773  |
| H | 3.33498928  | 0.02464155  | 1.91367210  |
| H | 3.32994511  | 0.02199607  | -0.53219056 |
| H | 1.20023963  | 0.00806064  | -1.77278276 |
| H | 0.24021901  | 0.17260445  | 4.05384713  |
| H | 2.93339874  | -1.01568294 | 4.51394532  |
| H | 2.40616702  | 2.04024374  | 4.84658879  |
| H | 3.22675474  | -0.15991305 | 6.88550719  |
| H | 1.95204145  | -0.57222396 | 8.87227598  |
| H | 0.40316910  | 2.24409757  | 6.06815354  |
| H | 0.03912094  | -0.16864711 | 10.32798225 |
| H | -1.51049891 | 2.62823779  | 7.51843502  |
| H | -1.77549204 | 2.17457008  | 10.77553679 |
| H | -2.87138372 | 2.00341113  | 9.42180373  |
| H | -2.43524212 | 0.60338778  | 10.37958556 |

**CI2-me1**

|   |             |             |             |
|---|-------------|-------------|-------------|
| C | 0.00000000  | 0.00000000  | 0.00000000  |
| C | 0.00000000  | 0.00000000  | 1.38627124  |
| C | 1.20250392  | 0.00000000  | 2.09886622  |
| C | 2.40156259  | -0.00870720 | 1.37924051  |
| C | 2.39964081  | -0.01674124 | -0.00490902 |
| C | 1.19749324  | -0.00892723 | -0.70077066 |
| C | 1.22261957  | -0.01903281 | 3.56188261  |
| C | 0.05351753  | 0.25909325  | 4.39774642  |
| C | 0.09300945  | 1.70405647  | 4.33739278  |
| C | 0.33316341  | 2.46116574  | 5.56021784  |
| C | -0.61995764 | 3.40742144  | 6.12530413  |
| C | -0.32252470 | 4.07596042  | 7.32025803  |
| C | -1.83629831 | 3.70325518  | 5.50614713  |
| C | -1.19517829 | 5.00098100  | 7.85896621  |
| C | -2.70865037 | 4.63226967  | 6.05325252  |
| C | -2.40754569 | 5.29775269  | 7.23554861  |
| C | -3.35993483 | 6.30084568  | 7.83993517  |
| H | -0.93250095 | -0.00041796 | -0.53130042 |
| H | -0.92830190 | -0.01283009 | 1.92320006  |
| H | 3.33478061  | -0.00805577 | 1.91097745  |
| H | 3.32999534  | -0.02559348 | -0.53975651 |
| H | 1.19532755  | -0.01292400 | -1.77373241 |
| H | 2.17775783  | -0.15402449 | 4.03908640  |
| H | -0.08697984 | -0.23684540 | 5.33973183  |
| H | -0.01135373 | 2.19094666  | 3.38629643  |
| H | 1.17852925  | 2.18514220  | 6.16293064  |
| H | -2.10746587 | 3.20177518  | 4.59717378  |
| H | 0.60426255  | 3.86739706  | 7.82198765  |



|   |             |            |            |
|---|-------------|------------|------------|
| H | -3.63628467 | 4.83794044 | 5.55218664 |
| H | -0.93548723 | 5.49953247 | 8.77493226 |
| H | -2.86018991 | 7.23972086 | 8.05289472 |
| H | -4.18597528 | 6.51000494 | 7.17196437 |
| H | -3.77582738 | 5.93480847 | 8.77357820 |

**CI1-me2**

|   |             |             |             |
|---|-------------|-------------|-------------|
| C | -0.06807743 | 0.09145349  | 0.13612173  |
| C | -0.00639709 | -0.06335142 | 1.50988624  |
| C | 1.22302337  | -0.08095798 | 2.18001071  |
| C | 2.38733201  | 0.07951543  | 1.42121979  |
| C | 2.32280190  | 0.23840094  | 0.04566991  |
| C | 1.09734956  | 0.24247227  | -0.60450686 |
| C | 1.25721658  | -0.26547875 | 3.62965975  |
| C | 2.47913616  | -0.34309939 | 4.42056749  |
| C | 2.74298117  | 0.87812873  | 5.16016745  |
| C | 2.52210332  | 0.50934668  | 6.56074040  |
| C | 1.31948218  | 0.81062681  | 7.33452872  |
| C | 1.17685704  | 0.27475774  | 8.62082762  |
| C | 0.30399391  | 1.64380773  | 6.85345277  |
| C | 0.06848515  | 0.56370266  | 9.39656748  |
| C | -0.80906349 | 1.92711760  | 7.63027926  |
| C | -0.93252090 | 1.39127222  | 8.90355800  |
| H | -1.02170739 | 0.09703113  | -0.35653344 |
| H | -0.91310428 | -0.17731938 | 2.07427692  |
| H | 3.34264922  | 0.09166146  | 1.90954200  |
| H | 3.22869702  | 0.36210472  | -0.51672991 |
| H | 1.04976929  | 0.36483112  | -1.66934762 |
| H | 0.33028206  | -0.15380997 | 4.16437334  |
| H | 2.42958258  | 1.82494062  | 4.76324365  |
| H | 3.21986916  | -0.17601819 | 7.00586018  |
| H | 1.94406837  | -0.36907562 | 9.00883287  |
| H | 0.38421456  | 2.07201535  | 5.87420619  |
| H | -0.01776511 | 0.14353102  | 10.38036279 |
| H | -1.57688756 | 2.56854819  | 7.24165720  |
| H | -1.79366022 | 1.61446753  | 9.50331665  |
| C | 3.32427155  | -1.58296152 | 4.50484171  |
| H | 2.77808597  | -2.41887627 | 4.92909218  |
| H | 3.63238711  | -1.88448240 | 3.50776117  |
| H | 4.21788015  | -1.41509549 | 5.09323070  |

**CI2-me2**

|   |             |             |            |
|---|-------------|-------------|------------|
| C | -0.00000000 | -0.00000000 | 0.00000000 |
| C | -0.00000000 | -0.00000000 | 1.38419636 |
| C | 1.19993942  | -0.00000000 | 2.10243459 |
| C | 2.40123755  | -0.00052815 | 1.38793438 |

|   |             |             |             |
|---|-------------|-------------|-------------|
| C | 2.39947022  | -0.00829450 | 0.00163659  |
| C | 1.20111185  | -0.00735650 | -0.69762667 |
| C | 1.18187636  | 0.02538698  | 3.56527830  |
| C | 2.35140404  | -0.21498997 | 4.41590815  |
| C | 2.35242627  | 1.08098364  | 5.06627737  |
| C | 2.14739418  | 1.19347190  | 6.50859586  |
| C | 3.20166372  | 0.99532163  | 7.49446910  |
| C | 2.91864774  | 1.14252873  | 8.85874440  |
| C | 4.50451444  | 0.63772932  | 7.12868505  |
| C | 3.89389907  | 0.93077994  | 9.81696109  |
| C | 5.47989582  | 0.42807468  | 8.09067908  |
| C | 5.18115609  | 0.57153018  | 9.43790778  |
| C | 3.58163551  | -0.90061831 | 3.89539677  |
| H | -0.93116395 | 0.00233363  | -0.53353069 |
| H | -0.93248478 | -0.00107078 | 1.91719079  |
| H | 3.33040932  | 0.01634957  | 1.92329587  |
| H | 3.33130147  | -0.00828717 | -0.53087644 |
| H | 1.20179615  | -0.00964287 | -1.77059235 |
| H | 0.22585944  | 0.15635835  | 4.04528840  |
| H | 2.52537654  | 1.95474696  | 4.46657990  |
| H | 1.21661452  | 1.60347087  | 6.85502820  |
| H | 1.92622248  | 1.42019218  | 9.16164330  |
| H | 4.75506294  | 0.53143105  | 6.09110448  |
| H | 3.65302989  | 1.04681507  | 10.85649913 |
| H | 6.47289849  | 0.15515014  | 7.78792332  |
| H | 5.93822953  | 0.40889774  | 10.18056133 |
| H | 3.37460173  | -1.95345575 | 3.73556549  |
| H | 3.92427393  | -0.49615208 | 2.94454726  |
| H | 4.39780937  | -0.81616141 | 4.60331651  |

### **S<sub>1</sub>-me1 (min)**

|   |             |            |             |
|---|-------------|------------|-------------|
| C | -6.39289431 | 1.84533215 | 2.37077165  |
| C | -5.13289574 | 2.38464925 | 2.18467220  |
| C | -4.34471756 | 2.02207697 | 1.08305313  |
| C | -4.87186119 | 1.09135453 | 0.17878451  |
| C | -6.13436613 | 0.55264271 | 0.36838392  |
| C | -6.90205576 | 0.92607896 | 1.46209117  |
| C | -3.02605542 | 2.60623869 | 0.91836096  |
| C | -2.18116536 | 2.42339751 | -0.27124646 |
| C | -0.73785781 | 2.31104771 | -0.24338783 |
| C | 0.06323578  | 2.17373050 | 0.98207513  |
| C | 1.37480626  | 2.76477518 | 1.17148847  |
| C | 2.12662473  | 2.44903632 | 2.31262839  |
| C | 1.94041842  | 3.65776288 | 0.25650139  |
| C | 3.37750610  | 2.99528975 | 2.52111274  |

|   |             |             |             |
|---|-------------|-------------|-------------|
| C | 3.19684604  | 4.20257044  | 0.47275165  |
| C | 3.93871898  | 3.88471454  | 1.60440602  |
| C | 5.30013470  | 4.48882733  | 1.84896115  |
| H | -6.97778765 | 2.14016352  | 3.22107935  |
| H | -4.74873776 | 3.09597431  | 2.89180731  |
| H | -4.28925631 | 0.78145729  | -0.66639991 |
| H | -6.51716441 | -0.16068229 | -0.33650039 |
| H | -7.87947818 | 0.50762248  | 1.60573745  |
| H | -2.66429563 | 3.25010721  | 1.69952316  |
| H | -2.65132623 | 2.45067302  | -1.23711024 |
| H | -0.23325090 | 2.25354329  | -1.19029824 |
| H | -0.32572238 | 1.55690167  | 1.77214618  |
| H | 1.72083560  | 1.76476472  | 3.03452943  |
| H | 1.39524724  | 3.93631344  | -0.62407495 |
| H | 3.92817365  | 2.72881346  | 3.40463498  |
| H | 3.60222591  | 4.88602405  | -0.25013117 |
| H | 6.02332178  | 3.73067692  | 2.12861252  |
| H | 5.67186782  | 4.99097353  | 0.96461110  |
| H | 5.26706097  | 5.21873919  | 2.65220214  |

**S<sub>1</sub>-me2 (min)**

|   |             |             |             |
|---|-------------|-------------|-------------|
| C | -6.27919030 | 1.95780240  | 2.40646276  |
| C | -5.12928630 | 2.63001747  | 2.03185093  |
| C | -4.29368526 | 2.13021287  | 1.02382185  |
| C | -4.65342895 | 0.92136377  | 0.41544496  |
| C | -5.80595769 | 0.25023725  | 0.79241378  |
| C | -6.62595540 | 0.76408939  | 1.78662587  |
| C | -3.08718538 | 2.85987407  | 0.65871168  |
| C | -2.25610870 | 2.57486927  | -0.52134609 |
| C | -0.80749913 | 2.44642679  | -0.42490558 |
| C | -0.08030431 | 2.20518880  | 0.82880415  |
| C | 1.24589529  | 2.71316051  | 1.12728292  |
| C | 1.90307089  | 2.29411159  | 2.29316176  |
| C | 1.90843119  | 3.62343809  | 0.29388582  |
| C | 3.16652162  | 2.75990489  | 2.60877689  |
| C | 3.17387548  | 4.08883011  | 0.61344019  |
| C | 3.81053847  | 3.66017157  | 1.76924586  |
| H | -6.90426338 | 2.36270235  | 3.17944551  |
| H | -4.87057925 | 3.55281797  | 2.51670521  |
| H | -4.02207658 | 0.50095471  | -0.34296730 |
| H | -6.06028283 | -0.67613418 | 0.31338125  |
| H | -7.51760425 | 0.24255026  | 2.07661794  |
| H | -2.76840279 | 3.64705056  | 1.31901442  |
| H | -0.24739237 | 2.49709241  | -1.34105200 |
| H | -0.55102041 | 1.57909010  | 1.56552020  |

|   |             |            |             |
|---|-------------|------------|-------------|
| H | 1.41392434  | 1.59717121 | 2.94780639  |
| H | 1.42929105  | 3.97515705 | -0.59844263 |
| H | 3.64917853  | 2.42302412 | 3.50631542  |
| H | 3.66143666  | 4.78803124 | -0.03898212 |
| H | 4.79092639  | 4.02138345 | 2.01309900  |
| C | -2.85605233 | 2.68080094 | -1.90209550 |
| H | -2.41179389 | 1.95782722 | -2.57896375 |
| H | -3.92549165 | 2.52337237 | -1.88761078 |
| H | -2.67867126 | 3.66919050 | -2.32281286 |

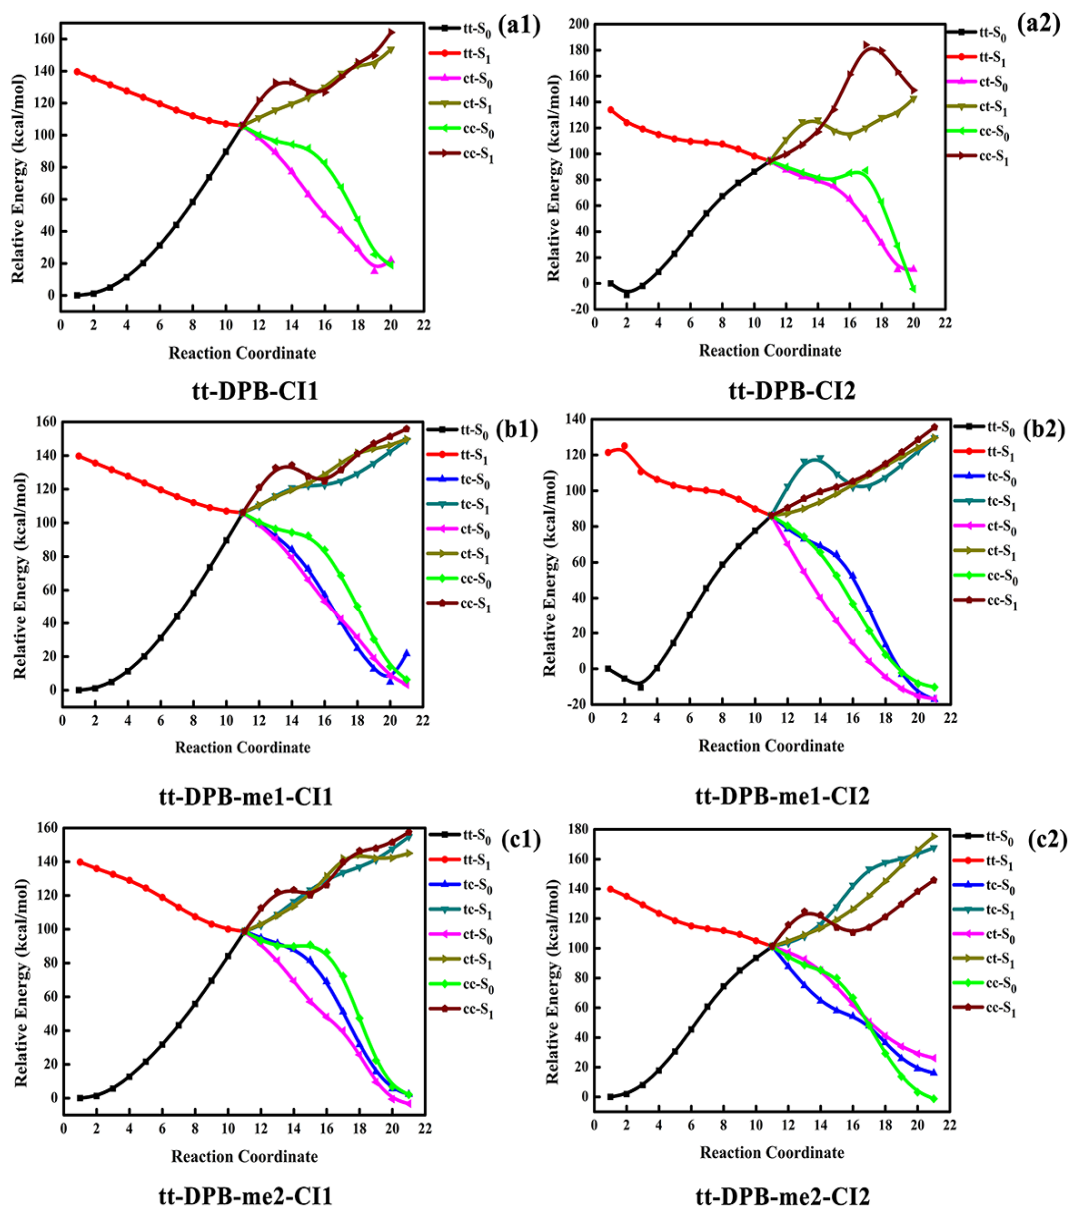

**Figure S5.** Relative energies with respect to the linear interpolation of internal coordinates (LIICs) from reactants to photoproducts at SA2-CASSCF(4,4)/6-31G level. (a1) and (a2) are the energy curves of photoisomerization of tt-DPB, (b1) and (b2) are curves for tt-DPB-me1, (c1) and (c2) are curves for tt-DPB-me2, respectively.

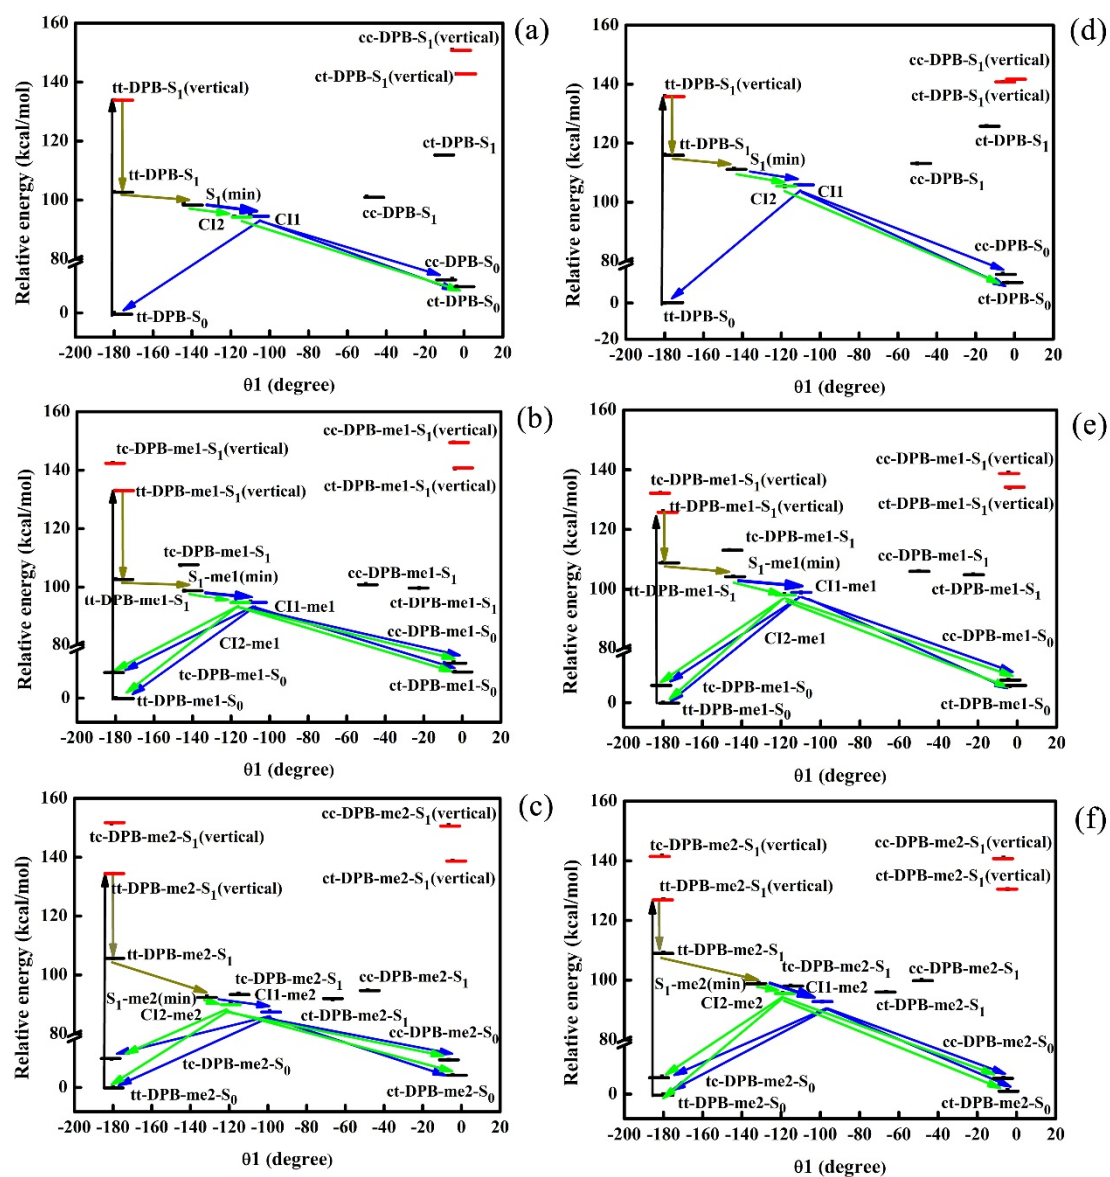

**Figure S6.** (a)-(c), (d)-(f) show the energies from SA2-CASSCF(4,4) and ICMRCI with 6-31G basis set calculations relative to the energy minima with respect to  $\theta_1$ .
